# National Database of Health Insurance Claims and Specific Health Checkups of Japan (NDB): Outline and Patient-Matching Technique

Kubo Shinichiro<sup>1</sup>, Noda Tatsuya<sup>1</sup>, Myojin Tomoya<sup>1,2</sup>, Nishioka Yuichi<sup>1,3</sup>, Higashino Tsuneyuki<sup>4</sup>,  
Matsui Hiroki<sup>5</sup>, Kato Genta<sup>6</sup>, Imamura Tomoaki<sup>1</sup>

\*1 Department of Public Health, Health Management and Policy, Nara Medical University

\*2 Department of Diagnostic Pathology, Nara Medical University

\*3 Department of Diabetology, Nara Medical University

\*4 Management Innovation Division, Mitsubishi Research Institute, Inc.

\*5 Department of Clinical Epidemiology and Health Economics, School of Public Health, The University of Tokyo

\*6 Solutions Center for Health Insurance Claims, Kyoto University Hospital

March 10, 2018

## Abstract

**Background:** The National Database of Health Insurance Claims and Specific Health Checkups of Japan (NDB) is a comprehensive database of health insurance claims data under Japan's National Health Insurance system. The NDB uses two types of personal identification variables (referred to in the database as “ID1” and “ID2”) to link the insurance claims of individual patients. However, the information entered against these ID variables is prone to change for several reasons, such as when claimants find or change employment, or due to variations in the spelling of their name. In the present study, we developed a new patient-matching technique that improves upon the existing system of using ID1 and ID2 variables. We also sought to validate a new personal ID variable (ID0) that we propose in order to enhance the efficiency of patient matching in the NDB database.

**Methods:** Our study targeted data from health insurance claims filed between April 2013 and March 2016 for hospitalization, combined diagnostic procedures, outpatient treatment, and dispensing of prescription medication. We developed a new patient-matching algorithm based on the ID1 and ID2 variables, as well as variables for treatment date and clinical outcome. We then attempted to validate our algorithm by comparing the number of patients identified by patient matching with the current ID1 variable and our proposed ID0 variable against the estimated patient population as of 1 October 2015.

**Results:** The numbers of patients in each sex and age group that were identified with the ID0 variable were lower than those identified using the ID1 variable. By using the ID0 variable, we were able to reduce the number of duplicate records for male and female patients by 5.8% and 6.4%, respectively. The numbers of children, adults older than 75 years, and women of reproductive age identified using the ID1 patient-matching variable were all higher than their corresponding estimates. Conversely, the numbers of these patients identified with the ID0 patient-matching variable were all within their corresponding estimates.

**Conclusion:** Our findings show that the proposed ID0 variable delivers more precise patient-matching results than the existing ID1 variable. The ID0 variable is currently the best available technique for patient matching in the NDB database. Future patient population estimates should therefore rely on the ID0 variable instead of the ID1 variable.

Keywords: health insurance claims in Japan, patient identification, personal identifiers

---

## 1. Introduction

1 Universal health coverage was established in Japan in 1961. Health service costs are  
2 largely covered by contributions from insurance societies or public funding, with  
3 copayment (up to 30% of the cost) that varies depending on age and income of  
4 beneficiaries and types of medical services provided. Hospitals and clinics prepare  
5 health insurance claims for individual patients every month and send them to the  
6 corresponding insurers through the Health Insurance Claims Review and  
7 Reimbursement Services, thereby receiving reimbursement accordingly. In 2006, a  
8

9 national database managed by the Japan Ministry of Health, Labour and Welfare  
10 containing data of health insurance claims and data of specific health checkups, was  
11 established to serve as a valuable resource for obtaining statistical data useful in  
12 formulating plans regarding medical care expenditure regulations<sup>1</sup>. Supported by the  
13 promotion of issuing health insurance claims online or via electronic media, the  
14 national database of health insurance claims and specific health checkups (NDB) was  
15 created to store anonymized data included in health insurance claims issued in April  
16 2009 and beyond. The NDB stores dental claims data and data regarding specific  
17 health checkups and specific health guidance given to beneficiaries. The specific  
18 health checkups and specific health guidance program, targeting insured and  
19 dependents aged 40-74 years, is one of several measures to prevent life-style diseases.  
20 Thus, the NDB stores information about findings from history taking, test results, and  
21 health guidance contents.

22 Given that Japan has a universal health coverage system, the NDB is one of the  
23 world's largest health-related databases and contains complete datasets of insured  
24 medical care, including information on approximately 12,884 million claims from  
25 over a hundred million individuals issued between April 2009 and December 2016  
26 (data as of March 2017)<sup>2</sup>. The contents of the NDB are findings from examinations by  
27 doctors, but not judgements by other professionals or patients themselves.  
28 Furthermore, health insurance claims are prepared and submitted to be reviewed for  
29 reimbursement, and thus they include valid information regarding medical care  
30 provided and drugs dispensed. Thus, effective use of the NDB enables retrospective  
31 cohort studies with a sample size of around 100 million, and other types of studies,  
32 with very small selection bias.

33 However, use of the NDB is currently limited. According to our previous study, this  
34 is mainly because the volume of information contained is very large, and the format of  
35 the insurance claims, originally designed for the reimbursement process, is not suited  
36 for research without modification<sup>3</sup>. In particular, identifying, tracking, and linking data  
37 corresponding to a given patient is a major challenge.

38 Health insurance claims are prepared for individual patients every month. A single  
39 patient often seeks medical care over multiple months, or visits different medical  
40 institutions within the same month, and thus time-course analysis cannot be  
41 appropriately conducted without linking data corresponding to a given individual.  
42 Such data linkage is supposed to be possible with ID1 and ID2, which are anonymized  
43 variables shown as sequences of alphanumeric characters. ID1 is a hash value  
44 generated from the insurer's ID, and the beneficiary's ID, date of birth, and sex; ID2 is  
45 a hash value generated from the beneficiary's name, date of birth, and sex. However,  
46 ID1 is not permanent, because the insurer can change when the beneficiary becomes  
47 employed or changes jobs. Similarly, ID2 can change when the beneficiary gets  
48 married or divorced, and due to orthographic variation among different medical  
49 institutions (e.g. use of different Chinese characters: 渡辺 vs 渡邊, which are both  
50 read as "Watanabe"<sup>4</sup>). This means that these IDs do not link data corresponding to the  
51 same person before and after a life event (e.g. finding employment, career change), but

52 wrongly indicate them as belonging to different individuals. This may result in  
 53 considerable errors in estimating the number of patients and in any estimates on a per  
 54 patient basis.

55 There are two types of errors in linking data of health insurance claims  
 56 corresponding to a given patient: wrongly linking health insurance claims that belong  
 57 to different individuals (Type I error, Figure 1) and not linking health insurance claims  
 58 belonging to the same individual (Type II error, Figure 2).  
 59

|                                                          |           | ID 1 (insurer's ID (household), date of birth, sex)                                                                                                                                |                                                                                                                                     |
|----------------------------------------------------------|-----------|------------------------------------------------------------------------------------------------------------------------------------------------------------------------------------|-------------------------------------------------------------------------------------------------------------------------------------|
|                                                          |           | Same                                                                                                                                                                               | Different                                                                                                                           |
| ID 2<br>(name in Chinese characters, date of birth, sex) | Same      | X1: The same ID1 and the same ID2 assigned to different individuals                                                                                                                | Y1: The same ID2 assigned to different individuals<br>Y2: Different individuals of same sex, having the same date of birth and name |
|                                                          | Different | Z1: The same ID1 assigned to different individuals<br>Z2: Multiple birth offspring of same sex born on the same date (e.g. twins) (annual number of multiple birth cases: 10,000*) | (Not an error: eliminated from analysis)                                                                                            |

\*1 2014 Current Population Survey vol. 1, Births, Table 4.36 Annual case numbers of single birth and multiple birth, by type of multiple birth, and by live birth-stillbirth combination

60

61 Figure 1. Assignment of the same ID to different individuals (type I error)  
 62

|                                                          |           | ID 1 (insurer's ID (household), date of birth, sex)                                                                                                                                                                                                                                                                                                                     |                                                                                                                                                                                                                                                                                                                                                                                                                                                                                                                                                                                                                                                                                                                                                  |
|----------------------------------------------------------|-----------|-------------------------------------------------------------------------------------------------------------------------------------------------------------------------------------------------------------------------------------------------------------------------------------------------------------------------------------------------------------------------|--------------------------------------------------------------------------------------------------------------------------------------------------------------------------------------------------------------------------------------------------------------------------------------------------------------------------------------------------------------------------------------------------------------------------------------------------------------------------------------------------------------------------------------------------------------------------------------------------------------------------------------------------------------------------------------------------------------------------------------------------|
|                                                          |           | Unchanged                                                                                                                                                                                                                                                                                                                                                               | Changed                                                                                                                                                                                                                                                                                                                                                                                                                                                                                                                                                                                                                                                                                                                                          |
| ID 2<br>(name in Chinese characters, date of birth, sex) | Unchanged | (Not an error: eliminated from analysis)                                                                                                                                                                                                                                                                                                                                | A1-1: Became employed, career change<br>A1-2: Separated from employment<br>A1-3: Retired<br>A1-4: Became independent (found employment, career change)<br>8000,000/year*1<br>A2-1: Changes in insurance following the change in insurance after marriage/divorce of the insured person<br>A2-2: Changes in insurance after being adopted by a different insured person<br>A2-3: Changes in the insured person of dependents (family: descendant, ascendant, spouse)<br>A3: Change of the district of residence in individuals with a National Health Insurance membership<br>A4: Became eligible for the Health Insurance System for Latter-stage Elderly People 1220000/year*2<br>A5: Insurance card number leaked, approximately 18470 cases*3 |
|                                                          | Changed   | B1: Name changed after being adopted (workers-adults) *4<br>B2-1: Name changed after marriage (650,000 couples/year)*5 or divorce<br>B2-2: Name changed because the insured person married or divorced<br>B3: Change of name, 20,000 cases/year*5<br>B4: Errors and inconsistencies in name input<br>B5: Name changed on acquisition of nationality, 1,000 cases/year*7 | Combination of A and B<br>(Examples)<br>A1-2 and B2-1: Separated from employment after marriage<br>A1-1 and B2-1: Became employed and name changed after divorce<br>A2-2 and B1: Name and insurer changed after adoption*4<br>C3: Sex changed, 855 cases/year *6                                                                                                                                                                                                                                                                                                                                                                                                                                                                                 |

\*1 Ministry of Health, Labour and Welfare, "Outlines of findings of the 2014 survey on employment trends". Note: This figure include those who became non-regular employees, and thus does not reflect the number of people who became independent.

\*2 Ministry of Internal Affairs and Communications, Statistics Bureau, Demographic Forecast (as of October 1 2014). Nationwide: population by age (year) and by sex. Prefectural: by age (5-years group) and by sex. Japanese individuals aged 75 years or older were analysed.

\*3 Ministry of Health, Labour and Welfare, Health Insurance Bureau, "Outlines of investigation outcomes of the leakage of personal information including the insurance member number, and measures for changes in insurance member number"

\*4 The number of adoptions was 83611 (including both sexes, and both children and adults)

\*5 Ministry of Justice, family register statistics, as of 2014.

\*6 Judicial statistics, as of 2015.

\*7 Ministry of Justice, trends in neutralization permission applications and approvals, 2015. Note: Individuals who already held a insurance card with his/her name unchanged after neutralization were included.

63

64 Figure 2: Assignment of different IDs to the same individual (type II error)  
 65

65

66 The same ID2 can be assigned to different individuals (type I error) when their  
67 names, dates of birth and sex are identical. People with the same family name and  
68 given name are not rare, and certain family names are very common in certain regions  
69 (e.g. Okinawa Prefecture). Also, there are trends in given names depending on the  
70 birth year. Thus, the number of individuals of same sex with the same name, and date  
71 of birth is not negligible.

72 The ID1 of the same patient changes (type II error) when the insurer's ID, and  
73 consequently, beneficiary's ID change. This occurs following a life event, such as  
74 career change, loss of employment, and retirement. The impact of change in insurer is  
75 substantial, because it also affects ID1s of dependents of the insured individual. Also,  
76 ID1 of a national health insurance changes each time the insured individual relocates.  
77 Furthermore, everybody's ID1 changes at age 75 years when the Health Insurance  
78 System for Latter-stage Elderly People takes effect. Taken together, a completely  
79 different ID1 can be given to the same patient after a life event. Meanwhile, ID2  
80 changes mainly due to change of name (change of family name upon adoption or  
81 marriage), and errors and inconsistencies in name input such as (1) differences in  
82 characters used (e.g. all Chinese character vs all Katakana; 鈴木太郎 vs スズキタロウ  
83 for "Suzuki Taro"); (2) difference in use of space between family and given names  
84 (e.g. 鈴木太郎 vs 鈴木 太郎); (3) difference in character encoding such as use of  
85 full- and half-width characters (e.g. スズキタロウ vs スズキタロウ); and (4) difference in  
86 glyph used (e.g. 渡辺 vs 渡邊). It is very difficult to link data if ID1 and ID2 change  
87 simultaneously. For example, both name and the insurer change in roughly  
88 synchronized timing when an insured person retires from their job upon marriage or  
89 adoption.

90 To address these problems, a unique personal ID that remains unchanged  
91 throughout life needs to be used in the NDB. Such an ID system is likely to be fully  
92 available in the field of health care after 2020. This unique personal ID system is not  
93 beneficial in analyzing existing data and use of ID1 and ID2 are the only option.  
94 Meanwhile, use of ID3 was proposed for better data linkage<sup>5</sup>. ID3 eliminates  
95 orthographic variations affecting ID1 (full- or half-width, with/without an additional  
96 zero in front) for better linkage between data of specific health checkups and data of  
97 health insurance claims. Thus, the process of linking different IDs possibly  
98 corresponding to the same individual is still required.

99 The objectives of this study are to propose a new personal ID (ID0) that achieves,  
100 with various modifications, more efficient data linkage than the ones currently  
101 available, and to verify the new ID0-based approach.  
102

## 103 2. Methods

104 Subjects of this study were medical inpatient claims, medical outpatient claims,  
105 diagnosis procedure combination (DPC) claims, and pharmacy claims, but not dental  
106 claims and specific health checkups data, issued in a 36-month period (April  
107 2013-March 2016). DPC claims were defined as claims corresponding to bundled

108 payments during DPC hospitalization at a DPC institution (claims for non-bundled  
 109 payments were categorized as inpatient claims). A new algorithm using ID1, ID2, data  
 110 of medical care received, and medical care outcome was tested to track changes in IDs  
 111 of the same individual over multiple months. Given that medicine prescribed for  
 112 outpatients is likely to be dispensed at pharmacies outside the medical institution,  
 113 one-to-one linkage would become more difficult if pharmacy claims data are included  
 114 in en bloc data processing. Thus, an intermediate data set was prepared from DPC and  
 115 medical care (inpatient and outpatient) claims, and a separate intermediate data set was  
 116 prepared from pharmacy claims data, and the two were examined side by side to  
 117 obtain complete linkage. The following is the newly developed algorithm for linking  
 118 data corresponding to a given individual.

## 119 **2.1 Preparation of an intermediate data set from medical (inpatient 120 and outpatient) and DPC claims**

121 Figure 3 shows an example of an intermediate data set. ID1, ID2, date of medical  
 122 care, and medical care outcomes were extracted from “medical inpatient claims”,  
 123 “medical outpatient claims”, “medical inpatient claims subjected to bundled payment  
 124 during DPC hospitalization”, “DPC claims during DPC hospitalization” and “DPC  
 125 claims subjected to bundled payment during DPC hospitalization”. First, data dated  
 126 within a period of a few months were searched for the same ID1, which were  
 127 considered to correspond to the same individual. The data linkage process ended when  
 128 death was noted in the outcome section.  
 129

| ID1    | ID2    | Medical institution code | Date of medical care received | Prefecture code | Gender code | Age group code | Inpatient/outpatient code |
|--------|--------|--------------------------|-------------------------------|-----------------|-------------|----------------|---------------------------|
| Xb0Vtu | aXxy1T | akdiiT                   | 42505                         | 45              | 1           | 220            | 1                         |
| Xb0Vtu | aXxy1T | akdiiT                   | 42506                         | 45              | 1           | 220            | 1                         |
| Xb0Vtu | aXxy1T | akdiiT                   | 42507                         | 45              | 1           | 220            | 1                         |
| b3zYx1 | aXxy1T | akdiiT                   | 42507                         | 45              | 1           | 220            | 1                         |
| b3zYx1 | ZzYyTz | qbmilc                   | 42507                         | 40              | 1           | 220            | 1                         |
| b3zYx1 | ZzYyTz | qbmilc                   | 42508                         | 40              | 1           | 220            | 1                         |
| b3zYx1 | ZzYyTz | qbmilc                   | 42509                         | 40              | 1           | 220            | 1                         |
| b3zYx1 | ZzYyTz | qbmilc                   | 42510                         | 40              | 1           | 220            | 1                         |
| b3zYx1 | ZzYyTz | qbmilc                   | 42511                         | 40              | 1           | 220            | 1                         |
| 6YwxWV | ZzYyTz | qbmilc                   | 42511                         | 40              | 1           | 220            | 1                         |
| 6YwxWV | ZzYyTz | qbmilc                   | 42512                         | 40              | 1           | 220            | 1                         |
| 6YwxWV | ZzYyTz | qbmilc                   | 42601                         | 40              | 1           | 220            | 1                         |
| 6YwxWV | ZzYyTz | qbmilc                   | 42602                         | 40              | 1           | 220            | 1                         |
| 6YwxWV | ZzYyTz | qbmilc                   | 42603                         | 40              | 1           | 220            | 1                         |

130 Figure 3. Example of data linking

131  
 132 When a sequence of claims tracked by an ID1 ended at a certain time, the  
 133 corresponding ID2 around that timing was used for further tracking. When multiple  
 134 ID2 candidates were found, the data linkage process was ended to avoid linkage of

135 data corresponding to different individuals.

136 Claims associated with an individual whose eligibility is under question need to be  
137 re-reviewed by the insurer through the Health Insurance Claims Review and  
138 Reimbursement Services. Such claims for re-review are not included in the NDB, and  
139 the old ID1 and a newly assigned ID1 can co-exist for about 3 months. To address this  
140 problem, the ID2 corresponding to the old ID1 was used for search data in the  
141 following month, in the first preceding month, and then in the second preceding month  
142 to obtain an intermediate dataset table (medical and DPC).

143

## 144 **2.2 Preparation of an intermediate dataset from pharmacy claims**

145 ID1, ID2, and date of medical care were extracted from pharmacy claims. Data  
146 dated within a period of a few months were searched for the same ID1, and were  
147 considered to correspond to the same individual. When a sequence of claims with ID1  
148 ended, ID2 was used for further tracking in a similar manner to that described in 2.1.

149

## 150 **2.3. Linkage of medical claims (inpatient and outpatient) and 151 pharmacy claims**

152 Two types of intermediate dataset tables (see above) were linked to make a table  
153 that chronologically paired different ID1s belonging to the same individual  
154 (one-to-one ID1 pairing table). The left ID1 and the right ID1, assigned to the same  
155 person, in the same row are henceforth referred to as the old ID1 and the new ID1,  
156 respectively (e.g. p8d89jss is the old ID1 and ue8k22ue is the new ID1 in the  
157 p8d89jss-ue8k22ue pair). The old ID1 is the first ID1 issued irrespective of the  
158 category of the claim. When a set of reversible pairs (the kwyrls5T-Loi2g7Zx pair and  
159 the Loi2g7Zx-kwyrls5T pair) is observed, one pair is eliminated from the analysis.

160

## 161 **2.4 Linking data corresponding to a given individual**

162 Using the initial data-linking table, the new ID1 was replaced by the old ID1 within  
163 a row so that a single ID1 was assigned (provisional ID0). When the replaced ID1 was  
164 the old ID1 of the different pair, it was replaced by the new ID1. This process was  
165 repeated until all second ID1s were replaced. The remaining ID1 was defined as a new  
166 variable ID0 (Figure 4). In other words, by replacing an old ID1 sequentially with a  
167 new ID1, a new data-linkage variable ID0 was obtained. When there were no linkable  
168 claims because only one visit was made to seek medical care (hence no one-to-one  
169 ID1 pairing), ID1 of the single claim served as ID0.

170

One-to-one ID1 pairing table

| Old ID1  | New ID1  | ID2      |
|----------|----------|----------|
| p8d89jss | ue8k22ue | kerhu23y |
| ue8k22ue | Ajdke783 | kerhu23y |
| Ajdke783 | 78wmdjfg | kerhu23y |

Initial data-linking table

| ID1      | ID0      | Date from | Date to | ID2 From | ID2 To   |
|----------|----------|-----------|---------|----------|----------|
| p8d89jss | p8d89jss | 201304    | 201306  | 382dhs87 | dk328d87 |
| ue8k22ue | ue8k22ue | 201307    | 201308  | hs8ye726 | ajd728uj |
| Ajdke783 | Ajdke783 | 201401    | 201403  | la9js7d8 | pq9e8eud |

Data-linking table (after first-round chronological integration)

| ID1      | ID0      | Date from | Date to | ID2 From | ID2 To   |
|----------|----------|-----------|---------|----------|----------|
| p8d89jss | ue8k22ue | 201304    | 201306  | 382dhs87 | dk328d87 |
| ue8k22ue | Ajdke783 | 201307    | 201308  | hs8ye726 | ajd728uj |
| Ajdke783 | 78wmdjfg | 201401    | 201403  | la9js7d8 | pq9e8eud |

Data-linking table (after second-round chronological integration)

| ID1      | ID0      | Date from | Date to | ID2 From | ID2 To   |
|----------|----------|-----------|---------|----------|----------|
| p8d89jss | Ajdke783 | 201304    | 201306  | 382dhs87 | dk328d87 |
| ue8k22ue | 78wmdjfg | 201307    | 201308  | hs8ye726 | ajd728uj |
| Ajdke783 | 78wmdjfg | 201401    | 201403  | la9js7d8 | pq9e8eud |

Data-linking table (after third-round chronological integration)

| ID1      | ID0      | Date from | Date to | ID2 From | ID2 To   |
|----------|----------|-----------|---------|----------|----------|
| p8d89jss | 78wmdjfg | 201304    | 201306  | 382dhs87 | dk328d87 |
| ue8k22ue | 78wmdjfg | 201307    | 201308  | hs8ye726 | ajd728uj |
| Ajdke783 | 78wmdjfg | 201401    | 201403  | la9js7d8 | pq9e8eud |

Figure 4. ID-linking process

The number of patients of each sex in each age group was estimated using ID0-based data aggregation, and resulting estimates were compared with those from ID1-based data aggregation in order to confirm the validity of this new variable. In addition, the rates of beneficiaries in the NDB (henceforth, the estimated rate of patients) were calculated using the estimated population (as of October 1, 2015), published by the Statistics Bureau, Ministry of Internal Affairs and Communications.

This study was approved by the Nara Medical School Ethics Committee (October 8, 2015, approval number 1123) and conducted in compliance with the Ethical Guidelines for Medical and Health Research Involving Human Subjects (announced in 2014, by the Ministry of Education, Culture, Sports, Science and Technology, and the Ministry of Health, Labour and Welfare).

### 3. Results

#### 3.1 Characteristics of ID1 and ID2 in the NDB

There are three ID1-ID2 combinations in terms of changes over time: (1) both unchanged; (2) one is changed; and (3) both are changed. The 1:1 pairing was maintained in the case of (1) above, while multiple ID1s or ID2s could be linked to a

171

172

173

174

175

176

177

178

179

180

181

182

183

184

185

186

187

188

189

190 single ID2 or ID1, respectively in the cases of (2) and (3) above. For example, change  
 191 of job and resulting change of insurer without change of name results in two ID2s  
 192 corresponding to one ID1 in the NDB. Table 1 shows the occurrence rates of multiple  
 193 ID1s or ID2s corresponding to a single ID2 or ID1, respectively, in the 36-month  
 194 period.

195 Table 1. Multiple ID1s and ID2s linking to a single ID2 and ID1, respectively

| Claims             | Multiple ID2s to a single ID1 |             |               | Multiple ID1s to a single ID2 |             |               |
|--------------------|-------------------------------|-------------|---------------|-------------------------------|-------------|---------------|
|                    | No. of IDs                    | No. of case | rate vs total | No. of ID                     | No. of case | rate vs total |
| DPC                | 1                             | 6,551,879   | 98.60%        | 1                             | 6,598,453   | 98.90%        |
|                    | 2                             | 95,502      | 1.40%         | 2                             | 71,336      | 1.10%         |
|                    | 3                             | 500         | 0.00%         | 3                             | 1,125       | 0.00%         |
|                    | 4                             | +++         | 0.00%         | 4                             | 23          | 0.00%         |
|                    | 5                             | ***         | 0.00%         |                               |             |               |
|                    | 6                             | ***         | 0.00%         |                               |             |               |
| Total              | 6,647,932                     | 100%        |               | 6,670,937                     | 100%        |               |
| Medical inpatient  | 1                             | 5,600,307   | 98.00%        | 1                             | 5,661,120   | 98.60%        |
|                    | 2                             | 112,202     | 2.00%         | 2                             | 79,723      | 1.40%         |
|                    | 3                             | 974         | 0.00%         | 3                             | 2,221       | 0.00%         |
|                    | 4                             | 17          | 0.00%         | 4                             | +++         | 0.00%         |
|                    |                               |             |               | 5                             | ***         | 0.00%         |
| Total              | 5,713,500                     | 100%        |               | 5,743,180                     | 100%        |               |
| Medical outpatient | 1                             | 93,145,865  | 79.60%        | 1                             | 122,674,241 | 92.90%        |
|                    | 2                             | 22,651,589  | 19.40%        | 2                             | 8,568,817   | 6.50%         |
|                    | 3                             | 1,141,050   | 1.00%         | 3                             | 726,050     | 0.50%         |
|                    | 4                             | 96,966      | 0.10%         | 4                             | 71,728      | 0.10%         |
|                    | 5                             | 9,678       | 0.00%         | 5                             | 8,055       | 0.00%         |
|                    | 6                             | 2,192       | 0.00%         | 6                             | 1,250       | 0.00%         |
|                    | 7                             | 527         | 0.00%         | 7                             | 222         | 0.00%         |
|                    | 8                             | 155         | 0.00%         | 8                             | 60          | 0.00%         |
|                    | 9                             | 54          | 0.00%         | 9                             | 29          | 0.00%         |
|                    | 10                            | 16          | 0.00%         | 10                            | 15          | 0.00%         |
|                    | 11                            | ***         | 0.00%         | 11                            | ***         | 0.00%         |
|                    | 12                            | ***         | 0.00%         | 12                            | ***         | 0.00%         |
|                    | 14                            | ***         | 0.00%         |                               |             |               |
|                    | Total                         | 117,048,101 | 100%          |                               | 132,050,478 | 100%          |
| Pharmacy           | 1                             | 87,623,580  | 92.30%        | 1                             | 89,656,685  | 93.50%        |
|                    | 2                             | 7,006,675   | 7.40%         | 2                             | 5,707,316   | 6.00%         |
|                    | 3                             | 282,877     | 0.30%         | 3                             | 439,799     | 0.50%         |
|                    | 4                             | 21,838      | 0.00%         | 4                             | 41,828      | 0.00%         |
|                    | 5                             | 2,073       | 0.00%         | 5                             | 4,623       | 0.00%         |
|                    | 6                             | 474         | 0.00%         | 6                             | 714         | 0.00%         |
|                    | 7                             | 87          | 0.00%         | 7                             | 140         | 0.00%         |
|                    | 8                             | 16          | 0.00%         | 8                             | 42          | 0.00%         |
|                    | 9                             | ***         | 0.00%         | 9                             | 14          | 0.00%         |
|                    | 10                            | ***         | 0.00%         | 10                            | ***         | 0.00%         |
|                    | 14                            | ***         | 0.00%         | 11                            | ***         | 0.00%         |
|                    |                               |             |               | 12                            | ***         | 0.00%         |
|                    | Total                         | 94,937,633  | 100%          |                               | 95,851,172  | 100%          |

196 \*\*\*: not disclosed due to a small number (<10), +++: after masking (≥10)

197 The rates of ID1s linked to only one ID2 (one-to-one pairing) were high (≥98%) in  
 198 DPC claims and medical inpatient claims, but were relatively low in medical  
 199 outpatient claims (79.6%) and pharmacy claims (92.3%). Such one-to-one pairing can  
 200 be due to a single claim issued during the study period, or simultaneous changes in  
 201 both IDs on a single claim (appearing as the first claim of an independent individual,  
 202 although it is one of multiple claims corresponding to the same given individual), and  
 203 all such claims were counted in this study.

204 The rate of ID2s linked to only one ID1 was 92.9% in medical outpatient claims,



205 while that of ID1s linked to only one ID2 dropped markedly to 79.6%. This may be  
 206 explained by orthographic variations of names that appear to occur frequently if  
 207 patients visit multiple medical institutions. This influences the quality of linking of  
 208 data corresponding to a given beneficiary.  
 209

### 210 3.2 Comparison of the accuracy between ID0-based and ID1-based 211 data linking

212 FY2015 data, including PDC, medical inpatient, medical outpatient, and pharmacy  
 213 claims, were analyzed using either ID0 or ID1 to estimate the number of patients by  
 214 age group. The proportion of beneficiaries in the NDB (estimated rate of patients) to  
 215 the estimated population (as of October 2015) by age group was also calculated  
 216 (Tables 2 and 3). The numbers of both male and female patients were smaller when  
 217 data was linked with ID0 than with ID1. The rate of the number of newly linked  
 218 claims by use of ID0 to the number of patients by ID1-based linkage was 5.8% in men  
 219 and 6.4% in women. The numbers of male and female patients aged 0-9, 65-59, and  
 220  $\geq 75$  years, and of female patients aged 20-35 years by ID1-based linkage markedly  
 221 exceeded the corresponding estimated populations. In contrast, the numbers of male  
 222 and female patients aged 0-9, male patients aged  $\geq 80$  years, and female patients  $\geq 85$   
 223 years by ID0-based data linkage markedly exceeded the corresponding estimated  
 224 populations, but those of patients in other age groups were within the estimated  
 225 populations.  
 226  
 227  
 228

229 Table 2. ID0- and ID1-based estimation of the rate of patients by age group in FY2015  
 230 (men)

| Age group (years) | ID1-base estimate of patient number | ID0-base estimate of patient number | ID1-ID0   | Rate of additional linkage | Estimated populations (as of 2015) | Estimated rate of patients (ID1) | Estimated rate of patients (ID0) |
|-------------------|-------------------------------------|-------------------------------------|-----------|----------------------------|------------------------------------|----------------------------------|----------------------------------|
| 0-4               | 2,902,841                           | 2,701,346                           | 201,495   | 6.9%                       | 2,550,921                          | 113.8%                           | 105.9%                           |
| 5-9               | 2,986,718                           | 2,820,997                           | 165,721   | 5.5%                       | 2,714,591                          | 110.0%                           | 103.9%                           |
| 10-14             | 2,862,608                           | 2,735,321                           | 127,287   | 4.4%                       | 2,868,024                          | 99.8%                            | 95.4%                            |
| 15-19             | 2,642,449                           | 2,536,433                           | 106,016   | 4.0%                       | 3,085,416                          | 85.6%                            | 82.2%                            |
| 20-24             | 2,469,556                           | 2,330,268                           | 139,288   | 5.6%                       | 3,046,392                          | 81.1%                            | 76.5%                            |
| 25-29             | 2,680,572                           | 2,522,220                           | 158,352   | 5.9%                       | 3,255,717                          | 82.3%                            | 77.5%                            |
| 30-34             | 3,031,674                           | 2,873,256                           | 158,418   | 5.2%                       | 3,684,747                          | 82.3%                            | 78.0%                            |
| 35-39             | 3,393,432                           | 3,237,598                           | 155,834   | 4.6%                       | 4,204,202                          | 80.7%                            | 77.0%                            |
| 40-44             | 3,928,757                           | 3,766,946                           | 161,811   | 4.1%                       | 4,914,018                          | 79.9%                            | 76.7%                            |
| 45-49             | 3,568,198                           | 3,421,875                           | 146,323   | 4.1%                       | 4,354,877                          | 81.9%                            | 78.6%                            |
| 50-54             | 3,313,382                           | 3,170,192                           | 143,190   | 4.3%                       | 3,968,311                          | 83.5%                            | 79.9%                            |
| 55-59             | 3,224,537                           | 3,071,854                           | 152,683   | 4.7%                       | 3,729,523                          | 86.5%                            | 82.4%                            |
| 60-69             | 3,808,634                           | 3,451,475                           | 357,159   | 9.4%                       | 4,151,119                          | 91.7%                            | 83.1%                            |
| 65-69             | 4,741,221                           | 4,316,936                           | 424,285   | 8.9%                       | 4,659,662                          | 101.8%                           | 92.6%                            |
| 70-74             | 3,319,841                           | 3,212,377                           | 107,464   | 3.2%                       | 3,582,440                          | 92.7%                            | 89.7%                            |
| 75-59             | 3,215,431                           | 2,732,719                           | 482,712   | 15.0%                      | 2,787,417                          | 115.4%                           | 98.0%                            |
| 80-84             | 2,053,758                           | 2,043,227                           | 10,531    | 0.5%                       | 1,994,326                          | 103.0%                           | 102.5%                           |
| 85-89             | 1,162,019                           | 1,154,472                           | 7,547     | 0.6%                       | 1,056,641                          | 110.0%                           | 109.3%                           |
| 90-94             | 417,574                             | 414,334                             | 3,240     | 0.8%                       | 333,335                            | 125.3%                           | 124.3%                           |
| 95-99             | 88,427                              | 87,706                              | 721       | 0.8%                       | 63,265                             | 139.8%                           | 138.6%                           |
| $\geq 100$        | 12,620                              | 12,552                              | 68        | 0.5%                       | 8,383                              | 150.5%                           | 149.7%                           |
| unidentified      |                                     |                                     |           |                            | 828,411                            |                                  |                                  |
| 合計                | 55,824,249                          | 52,614,104                          | 3,210,145 | 5.8%                       | 61,841,738                         | 90.3%                            | 85.1%                            |

231

232  
233

Table 3. ID0- and ID1-based estimation of the rate of patients by age group in FY2015 (women)

| Age group (years) | ID1-base estimate of patient number | ID0-base estimate of patient number | ID1-ID0   | Rate of additional linkage | Estimated populations (as of 2015) | Estimated rate of patients (ID1) | Estimated rate of patients (ID0) |
|-------------------|-------------------------------------|-------------------------------------|-----------|----------------------------|------------------------------------|----------------------------------|----------------------------------|
| 0-4               | 2,748,574                           | 2,562,889                           | 185,685   | 6.8%                       | 2,436,785                          | 112.8%                           | 105.2%                           |
| 5-9               | 2,819,348                           | 2,667,262                           | 152,086   | 5.4%                       | 2,585,196                          | 109.1%                           | 103.2%                           |
| 10-14             | 2,679,450                           | 2,563,528                           | 115,922   | 4.3%                       | 2,731,293                          | 98.1%                            | 93.9%                            |
| 15-19             | 2,679,371                           | 2,561,397                           | 117,974   | 4.4%                       | 2,922,972                          | 91.7%                            | 87.6%                            |
| 20-24             | 3,032,249                           | 2,779,923                           | 252,326   | 8.3%                       | 2,921,735                          | 103.8%                           | 95.1%                            |
| 25-29             | 3,413,184                           | 3,096,815                           | 316,369   | 9.3%                       | 3,153,895                          | 108.2%                           | 98.2%                            |
| 30-34             | 3,794,206                           | 3,489,924                           | 304,282   | 8.0%                       | 3,606,131                          | 105.2%                           | 96.8%                            |
| 35-39             | 4,059,079                           | 3,784,893                           | 274,186   | 6.8%                       | 4,111,955                          | 98.7%                            | 92.0%                            |
| 40-44             | 4,550,591                           | 4,280,884                           | 269,707   | 5.9%                       | 4,818,200                          | 94.4%                            | 88.8%                            |
| 45-49             | 4,095,073                           | 3,858,235                           | 236,838   | 5.8%                       | 4,307,927                          | 95.1%                            | 89.6%                            |
| 50-54             | 3,754,610                           | 3,532,266                           | 222,344   | 5.9%                       | 3,961,985                          | 94.8%                            | 89.2%                            |
| 55-59             | 3,620,039                           | 3,372,870                           | 247,169   | 6.8%                       | 3,785,723                          | 95.6%                            | 89.1%                            |
| 60-69             | 4,141,780                           | 3,782,352                           | 359,428   | 8.7%                       | 4,303,891                          | 96.2%                            | 87.9%                            |
| 65-69             | 5,137,773                           | 4,787,259                           | 350,514   | 6.8%                       | 4,984,205                          | 103.1%                           | 96.0%                            |
| 70-74             | 3,905,513                           | 3,765,333                           | 140,180   | 3.6%                       | 4,113,371                          | 94.9%                            | 91.5%                            |
| 75-59             | 4,002,735                           | 3,409,676                           | 593,059   | 14.8%                      | 3,489,439                          | 114.7%                           | 97.7%                            |
| 80-84             | 2,965,788                           | 2,944,547                           | 21,241    | 0.7%                       | 2,967,094                          | 100.0%                           | 99.2%                            |
| 85-89             | 2,135,719                           | 2,116,096                           | 19,623    | 0.9%                       | 2,060,616                          | 103.6%                           | 102.7%                           |
| 90-94             | 1,142,237                           | 1,130,903                           | 11,334    | 1.0%                       | 1,015,785                          | 112.4%                           | 111.3%                           |
| 95-99             | 374,850                             | 371,411                             | 3,439     | 0.9%                       | 296,082                            | 126.6%                           | 125.4%                           |
| ≥ 100             | 76,207                              | 75,684                              | 523       | 0.7%                       | 53,380                             | 142.8%                           | 141.8%                           |
| unidentified      |                                     |                                     |           |                            | 625,347                            |                                  |                                  |
| Total             | 65,128,376                          | 60,934,147                          | 4,194,229 | 6.4%                       | 65,253,007                         | 99.8%                            | 93.4%                            |

234  
235

### 3.3 ID track rate in a three-year period

The rates of the numbers of ID0 in FY2014 and FY2015 versus the number of ID0 in 2013 (ID track rates) were calculated (Tables 4 and 5). The ID track rate dropped every year by roughly 10%, although inclusion of cases of deaths and of no medical claim made must be noted. The non-track rate peaked in individuals aged 20-24 years, gradually declining in older age groups, and then increasing again in those aged ≥85 years.

Seven patterns of the yearly presence and/or absence of claims in a 3-year period were summarized together with ID1-based and ID0-based estimates of the patient numbers (Table 6). Track rates and non-track rates in a 3-year period are shown in Table 7.

For example, the number of patients who visited a hospital in FY2013 is equal to A+B+C+D. Of those, the number of tracked patients in FY2014 is E+F. Therefore, the track rate of FY2014 patients in 2013 is (E+F)/(A+B+C+D). Similarly, the number of tracked patients in FY2015 is I+J, and the track rate in 2013 is (I+J)/(A+B+C+D).

These track rates are the rates of IDs entered in the database in certain years to those entered in the reference year, but not actual patient track rates because the absence of a claim in a certain year due to the following reasons were not taken into account: (1) death (≥ 1 million deaths per year); and (2) no insurance claim made (because patients did not visit hospitals/clinics). Thus, we adjusted the raw ID track rates with the above to estimate the actual patient track rates.

First, in pattern 3, claims were absent in 2014, but present in 2015, indicating that ID-linkage was not lost. Thus, the patient number in cell “J” in Table 6 was added to

257  
258

259 the number of tracked patients in 2014, and the corresponding estimate in 2016  
 260 obtained based on the total patient number was added to the number of tracked  
 261 patients in 2015. Secondly, the patient number in cell “H” was added to the number of  
 262 tracked patients in 2014 and 2015, because claims were made in a single year as  
 263 intended (e.g. claims corresponding to basically healthy beneficiaries). Lastly, the  
 264 annual number of deaths was added to the tracked patient number. With these  
 265 adjustments, the ID1-based non-track rate dropped to 31.7%, while the ID0-based  
 266 non-track rate dropped to 6.7%.

267  
 268 Table 4. ID track rate between 2013 and 2015 (men)

| Age group (years) | No. of tracked patients |            |            | Non-track rate |      |
|-------------------|-------------------------|------------|------------|----------------|------|
|                   | 2013                    | 2014       | 2015       | 2014           | 2015 |
| 0-4               | 2,771,836               | 2,605,080  | 2,492,733  | 6%             | 10%  |
| 5-9               | 2,817,459               | 2,645,331  | 2,502,248  | 6%             | 11%  |
| 10-14             | 2,793,074               | 2,593,271  | 2,376,648  | 7%             | 15%  |
| 15-19             | 2,493,326               | 2,138,046  | 1,846,311  | 14%            | 26%  |
| 20-24             | 2,291,451               | 1,783,726  | 1,545,973  | 22%            | 33%  |
| 25-29             | 2,612,312               | 2,125,291  | 1,856,644  | 19%            | 29%  |
| 30-34             | 2,916,629               | 2,462,412  | 2,177,310  | 16%            | 25%  |
| 35-39             | 3,388,503               | 2,931,083  | 2,606,639  | 13%            | 23%  |
| 40-44             | 3,624,797               | 3,168,144  | 2,832,335  | 13%            | 22%  |
| 45-49             | 3,183,234               | 2,822,016  | 2,558,981  | 11%            | 20%  |
| 50-54             | 2,982,234               | 2,687,216  | 2,475,269  | 10%            | 17%  |
| 55-59             | 3,048,311               | 2,772,717  | 2,575,662  | 9%             | 16%  |
| 60-69             | 3,832,411               | 3,436,340  | 3,210,298  | 10%            | 16%  |
| 65-69             | 3,747,865               | 3,480,790  | 3,321,085  | 7%             | 11%  |
| 70-74             | 3,319,978               | 3,136,271  | 2,979,843  | 6%             | 10%  |
| 75-79             | 2,642,922               | 2,481,235  | 2,359,388  | 6%             | 11%  |
| 80-84             | 1,905,220               | 1,761,457  | 1,621,891  | 8%             | 15%  |
| 85-89             | 1,054,270               | 925,399    | 805,457    | 12%            | 24%  |
| 90-94             | 343,818                 | 278,434    | 222,183    | 19%            | 35%  |
| 95-99             | 78,689                  | 55,938     | 39,185     | 29%            | 50%  |
| ≥100              | 11,215                  | 6,823      | 4,100      | 39%            | 63%  |
| Total             | 51,859,554              | 46,297,020 | 42,410,183 | 11%            | 18%  |

269  
 270 Table 5. ID track rate between 2013 and 2015 (women)

| Age group (years) | No. of tracked patients |            |            | Non-track rate |      |
|-------------------|-------------------------|------------|------------|----------------|------|
|                   | 2013                    | 2014       | 2015       | 2014           | 2015 |
| 0-4               | 2,631,496               | 2,455,561  | 2,342,469  | 7%             | 11%  |
| 5-9               | 2,667,387               | 2,488,503  | 2,337,878  | 7%             | 12%  |
| 10-14             | 2,606,693               | 2,406,947  | 2,211,559  | 8%             | 15%  |
| 15-19             | 2,545,157               | 2,266,765  | 2,043,680  | 11%            | 20%  |
| 20-24             | 2,815,416               | 2,300,540  | 2,028,828  | 18%            | 28%  |
| 25-29             | 3,295,039               | 2,759,453  | 2,443,648  | 16%            | 26%  |
| 30-34             | 3,613,670               | 3,148,750  | 2,847,355  | 13%            | 21%  |
| 35-39             | 4,014,149               | 3,568,381  | 3,253,591  | 11%            | 19%  |
| 40-44             | 4,180,832               | 3,738,287  | 3,421,031  | 11%            | 18%  |
| 45-49             | 3,626,668               | 3,277,676  | 3,027,346  | 10%            | 17%  |
| 50-54             | 3,365,422               | 3,073,068  | 2,861,927  | 9%             | 15%  |
| 55-59             | 3,397,284               | 3,095,614  | 2,891,806  | 9%             | 15%  |
| 60-69             | 4,247,141               | 3,884,053  | 3,661,480  | 9%             | 14%  |
| 65-69             | 4,185,212               | 3,959,582  | 3,813,201  | 5%             | 9%   |
| 70-74             | 3,901,843               | 3,730,497  | 3,575,450  | 4%             | 8%   |
| 75-79             | 3,340,996               | 3,191,305  | 3,097,005  | 4%             | 7%   |
| 80-84             | 2,807,870               | 2,680,704  | 2,553,906  | 5%             | 9%   |
| 85-89             | 1,983,260               | 1,830,867  | 1,677,370  | 8%             | 15%  |
| 90-94             | 1,016,985               | 878,040    | 747,606    | 14%            | 26%  |
| 95-99             | 322,954                 | 250,191    | 190,097    | 23%            | 41%  |
| ≥100              | 67,295                  | 44,162     | 28,454     | 34%            | 58%  |
| Total             | 60,634,782              | 55,030,960 | 51,057,702 | 9%             | 16%  |

271

272  
273

Table 6. Patterns of the presence/absence of claims and the estimated patient number (ID0)

| Pattern    | FY2013      | FY2014      | FY2015      | Estimated patient number (ID1) | Estimated patient number (ID0) |
|------------|-------------|-------------|-------------|--------------------------------|--------------------------------|
| 1          | A           | E           | I           | 77,592,278                     | 89,087,842                     |
| 2          | B           | F           |             | 16,449,344                     | 8,975,145                      |
| 3          | C           |             | J           | 4,312,101                      | 5,264,523                      |
| 4          | D           |             |             | 21,515,184                     | 9,818,854                      |
| 5          |             | G           | K           | 17,239,198                     | 10,204,568                     |
| 6          |             | H           |             | 8,819,987                      | 4,996,498                      |
| 7          |             |             | L           | 21,809,048                     | 8,935,644                      |
| Total(ID1) | 119,868,907 | 120,100,807 | 120,952,625 |                                |                                |
| Total(ID0) | 113,146,364 | 113,264,053 | 113,492,577 |                                |                                |

274  
275

Table 7. Patient track rates and non-track rates with ID1- and ID0-based approaches

| ID  | FY   | Estimated no. of patients | No. of patients to be tracked | No. of tracked patients (pre-adjustment) | Track rate (pre-adjustment) | Non-track rate (pre-adjustment) | Deaths per year | No claim*1 | A single year claim *2 | No. of tracked patients (post-adjustment)*3 | Track rate (post-adjustment) | Non-track rate (post-adjustment) |
|-----|------|---------------------------|-------------------------------|------------------------------------------|-----------------------------|---------------------------------|-----------------|------------|------------------------|---------------------------------------------|------------------------------|----------------------------------|
| ID1 | 2013 | 119,868,907               | 119,868,907                   | 119,868,907                              | 100.0%                      | 0.0%                            |                 |            |                        | 119,868,907                                 | 100.0%                       | 0.0%                             |
|     | 2014 | 120,100,807               | 119,868,907                   | 94,041,622                               | 78.5%                       | 21.5%                           | 1,256,359       | 4,312,101  | 8,819,987              | 108,430,069                                 | 90.3%                        | 9.7%                             |
|     | 2015 | 120,952,625               | 119,868,907                   | 81,904,379                               | 68.3%                       | 31.7%                           | 1,269,000       | 4,320,443  | 8,819,987              | 96,313,809                                  | 79.6%                        | 20.4%                            |
| ID0 | 2013 | 113,146,364               | 113,146,364                   | 113,146,364                              | 100.0%                      | 0.0%                            |                 |            |                        | 113,146,364                                 | 100.0%                       | 0.0%                             |
|     | 2014 | 113,264,053               | 113,146,364                   | 98,062,987                               | 86.7%                       | 13.3%                           | 1,269,000       | 5,264,523  | 4,996,498              | 109,593,008                                 | 96.8%                        | 3.2%                             |
|     | 2015 | 113,492,577               | 113,146,364                   | 94,352,365                               | 83.4%                       | 16.6%                           | 1,302,000       | 5,269,999  | 4,996,498              | 105,920,862                                 | 93.3%                        | 6.7%                             |

\*1 The number of patients who happened not to visit a medical institution.

\*2. The number of individuals who were healthy in the first year, and visited a medical institute in a following single year.

\*3. Number of tracked patients (post-adjustment)=Number of tracked patients (pre-adjustment)+ annual death number

+ Number of patients with no claim+ Number of patients with a single year claim

276  
277

## 4. Discussion

278

### 4.1 Evaluation of ID0-based data linkage

279

This study proposed ID0, which is ID1 after a process wherein multiple ID1s corresponding to a given beneficiary are paired using ID2 and health care outcome in order to justify the linking of different ID1s, and the preceding ID1 is sequentially replaced by a newly appearing ID1. This approach is novel mainly because outcome information, in addition to ID1 and ID2, in a 3-year period is used to obtain a new variable ID0. The same ID2 will be assigned to different beneficiaries if they are of same sex, with identical date of birth and name. Given that assignment of the same ID1 to multiple beneficiaries occurs less frequently (except dependent twins of same sex supported by the same insured individual), ID1 was solely used in many statistical analyses of the NDB, and changes in ID1 during a given study period were neglected in such analyses. Even though both ID1 and ID2 were used for data aggregation, there were some issues where the data of different beneficiaries were linked even though death was noted in the outcome section, and data of the same beneficiaries were not linked because of a delayed claim due to loss of eligibility of insured individuals. The ID0-based approach, as newly proposed in this study, overcomes these problems.

280

An old ID1 and a new ID1 can coexist after loss of eligibility for the old insurance coverage. To increase data aggregation accuracy as much as possible, linkable data were searched using ID2 month by month, not at one time but for a period of 3 months after change in ID1. Claims associated with the same beneficiaries can be issued twice in 1 month due to changes in ID1 and/or ID2. This study showed that, even when both

281  
282  
283  
284  
285  
286  
287  
288  
289  
290  
291  
292  
293  
294  
295  
296  
297  
298  
299

300 ID1 and ID2 were changed (quitting a job upon marriage, becoming independent  
301 beneficiaries upon divorce) at the same time, the old ID2 was occasionally used for a  
302 while, enabling data linking especially when claims were issued continuously (e.g.  
303 inpatient medical care and continuous outpatient treatment).

304 As a result, the ID0-based approach reduced the estimated number of male patients  
305 by 6.2%, and that of female patients by 7.1% compared with the corresponding  
306 ID1-based figures. The number of patients (but not total number of visits) exceeded  
307 the population estimates in several age groups, posing a significant concern with the  
308 ID1-based approach. The ID0-based approach appeared to yield a number closer to the  
309 actual patient number, except in some age groups (boys and girls aged 0-9 years, men  
310 aged  $\geq 80$  years, women aged  $\geq 85$  years), suggesting that this method is not perfect. It  
311 is noteworthy that the patient number here is the number of individual IDs in the NDB,  
312 and thus IDs of beneficiaries who died before the reference date for population  
313 statistics (usually October 1 in Japan) were counted. Also, changes in insurer due to  
314 finding a job, changing jobs, or retirement tend to peak in March at the end of the  
315 fiscal year. The fundamental solution to the current problems in ID-based data  
316 aggregation is assignment of unique lifetime ID to patients.

317 The rates of ID1s linked to only one ID2 were higher in medical inpatient claims  
318 and DPC claims than in medical outpatient claims. Inpatients (medical and DPC  
319 inpatients) are less likely to visit multiple medical institutions than outpatients,  
320 consequently, there would be less ID2 variations due to orthographic variations, which  
321 may explain such differences in ID1-ID2 pairing.

322 NDB data in a 3-year period were aggregated in this study. It must be noted that a  
323 certain number of patients became untrackable. Because ID0-based data linking is not  
324 perfect, and deaths cannot be identified clearly, the true patient trackability remains  
325 unknown. Even through deaths noted in the outcome section were taken into account,  
326 the track rate was as low as 70%. Improvement of accuracy of outcome information is  
327 anticipated.

328 Some age groups showed an estimated rate of patients of 100% or over after  
329 ID0-based data aggregation. This is clearly due to defects in the process of obtaining  
330 ID0, but no concrete explanation is currently available.

331 The Ministry of Internal Affairs and Communications estimates the population  
332 based on the latest national population census report, but the rate of the difference in  
333 figures between the national population census and the basic resident register to the  
334 figure in the basic resident register is approximately 1% (greater than 100 people)<sup>6</sup>.  
335 Also, this study used the 2013 mid-year population, not a population obtained after  
336 aggregation of a year's worth of data. Errors may exist in population estimates, but  
337 problems in this ID0-based system need to be addressed in the future. ID1-based data  
338 aggregation estimated the patient number much greater than the population estimates,  
339 and 13% more than that estimated by ID0-based data aggregation, in the group aged  
340 75-79 years. This may be mainly because everybody receives a new ID1 upon an  
341 insurer switch to the Health Insurance System for Latter-stage Elderly at age 75 years;  
342 ID1-based data aggregation is likely to process such newly assigned ID1s as those

343 assigned to different individuals. Given that the majority of NDB data correspond to  
344 the elderly population, there is a risk of large discrepancies between estimates and  
345 actual patient numbers.

346 One of the problems of ID0-based data linking, on which we are currently working,  
347 lies in male-female differences. The rate of the patient number (number of individual  
348 IDs) to the population estimate was lowest in men aged 20-39 years (slightly higher  
349 than 70%) than in any other age groups. This agrees with the notion of a low hospital  
350 visiting rate among young and middle-aged adults. However, the rate of the patient  
351 number to the population estimate in women aged 20-39 years reached 90%, which is  
352 higher than those in adjacent age groups. There are two possible reasons. One is health  
353 insurance claims related to childbirth. Childbirth costs are self-covered in principle.  
354 Thus, the NDB does not contain related claims, except those for perinatal medical care  
355 for abnormal labor (e.g. forceps delivery, vacuum extraction, and Caesarean section).  
356 These exceptional claims may contribute to a high estimated rate of beneficiaries who  
357 required medical care in women aged 20-39 years. The other reason is that the name  
358 and the insurer often change in women in such age groups. The rate of women who  
359 changed their second name to their husbands' second name was 96.2% in 2013, and  
360 consequently, ID2s of many women change after marriage<sup>7</sup>. If these women become  
361 dependents and are covered by their husbands' insurers (i.e. change in insurer) their  
362 ID1s also change. Changes in name and insurer can occur in both men and women, but  
363 particularly more frequently in women in their twenties and thirties. If such women  
364 visit medical institutions during the period when their ID1s and ID2s are changing,  
365 claims issued are likely to be dealt with as those corresponding to different women.

366 Medical care continuity check, based on the location where medical care was  
367 delivered and diagnostic outcomes, may increase the accuracy of ID0-based data  
368 linking. If claims with the same ID indicate that visits to different medical institutions,  
369 distantly located, were made for completely different health conditions, it is  
370 appropriate to think that those claims correspond to different beneficiaries. Conversely,  
371 if claims with different IDs indicate the same location, age group, diagnosis, and  
372 therapy contents, they are more likely to correspond to the same beneficiary. Of course,  
373 some may frequently go to a different location on business and visit a medical  
374 institution there, and different individuals may receive the roughly same treatment in  
375 the same location. More precise data linking using other pieces of information, such as  
376 location, age group, and diagnosis, would be achievable in limited cases. But even so,  
377 many problems need to be solved to reduce the risk of type I errors. Nevertheless,  
378 ID0-based data aggregation is designed to eliminate type I errors, and thus claims with  
379 unlinked IDs are dealt with as those corresponding to different beneficiaries even  
380 though they are highly likely to correspond to the same beneficiary.

## 381 **4.2 Rationale for using ID0**

382 This study estimated the number of patients after ID0-based data linking. The  
383 accuracy of ID1 is extremely low, and thus ID1-based cohort studies may not yield  
384 valid outcomes. As described earlier, ID1 is a hash value generated from the insurer's

385 ID, and the beneficiary's ID, data of birth, and sex, and changes in any of these  
386 elements result in changes in ID1. Indeed, ID1s of approximately 8 million  
387 beneficiaries change every year. Given that job change, transfer, and switching to the  
388 Health Insurance System for Latter-stage Elderly People occurs at any time of the year,  
389 it is advisable that the ID1-based approach be avoided even when analyzing NDB data  
390 of a single year. Use of both ID1 and ID2 is essential, but we did not opt for a less  
391 stringent approach, wherein data with at least one matched ID (either ID1 or ID2)  
392 were dealt with as those corresponding to the same beneficiary, to avoid linking data  
393 of different beneficiaries (e.g. twins and those with the same name). Our primary focus  
394 in this study is avoiding the linkage of claims belonging to different beneficiaries (type  
395 I errors).

396 It is noteworthy that certain conditions are required to obtain a valid ID0, as  
397 proposed by this study. First, this study used data of four types of health insurance  
398 claims (medical inpatient, medical outpatient, DPC, and pharmacy claims) in a 3-year  
399 period. In other words, these claims are those extractable from the NDB, regardless of  
400 the subgroup of patients (by special extraction). Thus, use of claims belonging to  
401 certain subgroups of patients may result in decreases in rate of ID pairing and  
402 reproducibility. The rate of ID0-based ID pairing will increase as more claims are used.  
403 Also, claims issued in a 1-month or longer period must be used.

404 An alternative ID currently under consideration is ID3. ID3 addresses orthographic  
405 variations (full- or half-width, with/without an additional zero in front) that cause  
406 unsuccessful linkage between data of specific health checkups and data of health  
407 insurance claims. ID3 was currently assigned to claims issued in 2015 and beyond,  
408 and its use will be extended to older claims. ID3 is a more precise version of ID1, and  
409 the accuracy of data linking will increase when ID2 is used in combination with ID3.

410 Dental claims were not used in this study, but the approach shown in this study is  
411 applicable, by merging an intermediate table made from data of medical inpatient care,  
412 medical outpatient care, DPC and dental care claims, with an intermediate table made  
413 from pharmacy claims.

414 An intermediate table made from data of medical inpatient care, medical outpatient  
415 care, and DPC claims was merged with that made from data of pharmacy claims in  
416 this study, to increase the ID-linkage rate. The rationale behind this is that medical  
417 care claims and associated pharmacy claims were likely to be issued in the same  
418 period and processing these two types of claims at the same time will reduce  
419 one-to-one ID pairing/linking. This must be avoided, being the exact point that we  
420 focused on, and a critical modification was made in this study.  
421

### 422 **4.3 Limits of the NDB**

423 The Japanese public health insurance system basically allows insured medical care,  
424 but not a mixed medical case series (combination of insured and uninsured treatment  
425 performed in the same series of medical treatment). The NDB is a complete  
426 enumeration of insured treatment claims, and thus does not contain information  
427 associated with uninsured treatment (e.g. some advanced therapies, esthetic treatment,

428 immunization, and health checks), publicly funded health care (e.g. provided to those  
429 who receiving income support), and diagnostic procedures. This fact needs to be  
430 considered when interpreting the outcomes of NDB analyses.

431 Also, the fact that the NDB is a complete enumeration of insured treatment claims,  
432 without inclusion of information associated with uninsured treatment and publicly  
433 funded health care must be clearly stated for appropriate discussion on differences  
434 between completely insured treatment and actual care provided.

435 Furthermore, it must be noted that names of health conditions in the NDB include  
436 undetermined diagnoses, and predetermined names of conditions that must be  
437 mentioned on the medical insurance claims for remuneration. In other words, names of  
438 conditions in the NDB are not necessarily confirmed diagnoses. When using the NDB,  
439 confirmed diagnoses need to be distinguished from the above temporarily assigned  
440 names of conditions, thereby determining the true names of health conditions in given  
441 individuals.

## 442 **5. Conclusions**

443 This study proposed a new innovative personal ID (ID0) for analysis of the NDB  
444 and evaluated ID0-based data aggregation that addressed the efficiency of existing  
445 data aggregation methods. Compared with existing methods using either ID1 or a  
446 combination of ID1 and ID2, the ID0-based method showed higher accuracy in data  
447 linking. However, problems where estimated patient number exceeded the actual  
448 population sizes remained in the following subgroups: children; old-old adults; and  
449 women of reproductive age. Nevertheless, the ID0 is the best variable to link data  
450 corresponding to a given individual, and thus it is recommended to use ID0 instead of  
451 ID1 when estimating the patient number.

## 452 **Acknowledgement**

453 This study was part of the 2016/2017 Health and Labour Sciences Research Grant  
454 (Research on Regional Medical) project entitled “Study on implementable measures  
455 required for: differentiation of hospital beds depending on purpose; cooperation  
456 between different purpose divisions; and efficient use of hospital beds” and the 2016  
457 Japan Agency for Medical Research and Development, Cross-regional ICT utilization  
458 project entitled “Study on medical performance evaluation including  
459 pharmacoepidemiologic approaches using a large-volume of electronic medical care  
460 data including health insurance claims”.

461

## 462 **References**

463 1) Genta Kato, Keiko Hirano, Naoki Akabane. Secondary use of the national  
464 database of health insurance claims and specific health checkups of Japan: a historical  
465 overview. *Statistics* (Japan Statistical Association) 2014; 10: 8-13. (in Japanese)

466 2) The 356 Central Social Insurance Medical Council Annual Meeting Agenda,  
467 Cross-regional issues (no. 2), outline of the national database of health insurance  
468 claims and specific health checkups of Japan (NDB). Japan Ministry of Health,  
469 Labour and Welfare, Health Insurance Bureau, Medical Economics Division, 2017. (in



- 470 Japanese)  
471 [<http://www.mhlw.go.jp/file/05-Shingikai-12404000-Hokenkyoku-Iryouka/000017093>  
472 1.pdf (cited 2017-Sep-08)].
- 473 3) Shinichiro Kubo, Tatsuya Noda, Tomoya Myojin, Genta Kato, Tomoaki Imamura.  
474 Japan Association for Medical Information Supplement 2016; 36 (1): 272-275. (in  
475 Japanese)
- 476 4) Shinichiro Kubo, Tatsuya Noda, Tomoya Myojin, Tsuneyuki Higashino, Hiroki  
477 Matsui, Genta Kato, Tomoaki Imamura. Necessity and considerations in use of the  
478 national database of health insurance claims and specific health checkups of Japan of  
479 Japan with linkage of data corresponding to a given individual. Japanese Journal of  
480 Health and Research 2017; 38: 11-18. (in Japanese)
- 481 5) Material 2 “Linking the dataset of health insurance claims and the dataset of  
482 specific health checkups of Japan (report)” at the 38<sup>th</sup> expert committee for provision  
483 of health insurance claims. Japan Ministry of Health, Labour and Welfare, Health,  
484 Insurance Bureau, Policy Division for Integration of Healthcare and Long-term Care,  
485 Health Insurance System Improvement Promotion Group. 2017. (in Japanese)  
486 [<http://www.mhlw.go.jp/file/05-Shingikai-12401000-Hokenkyoku-Soumuka/0000174>  
487 510.pdf (cited 2017-Sep-08)].
- 488 6) Shigeru Yamada. Precision of 2005 national census results. Central Research  
489 Service Report 2008. (in Japanese)
- 490 7) Japan Ministry of Health, Labour and Welfare. Marriage statistics, specified  
491 report of vital statistics in fiscal year 2016. 2017. (in Japan  
492 ese)
